# Supplementary material
Source: PubMed Central journal article supplement (PMC4515549)
Supplement: NIHMS63168-supplement-1.pdf [file NIHMS63168-supplement-1.pdf]

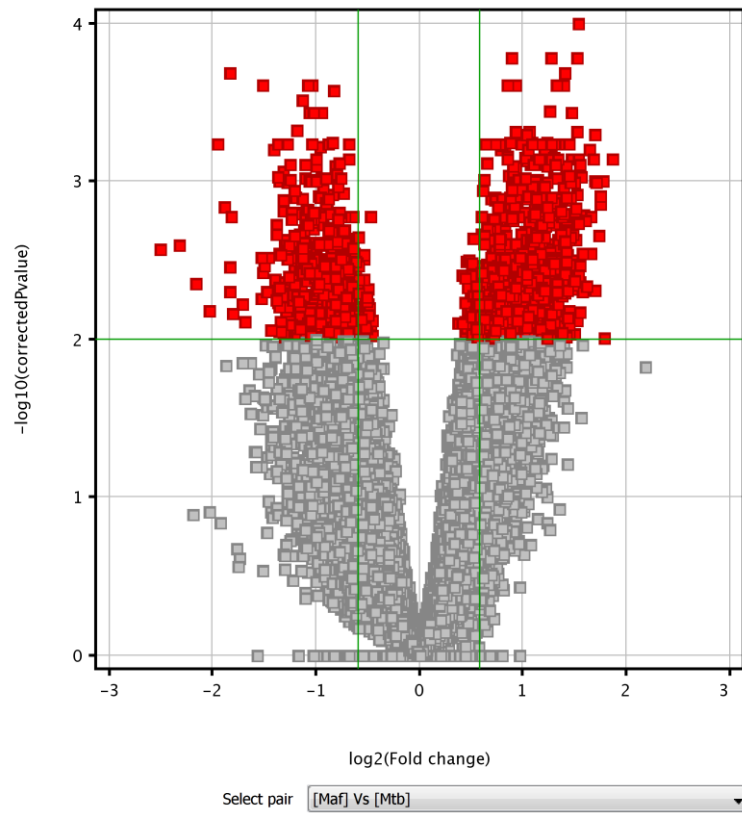

**Supplementary Figure 1: Peripheral blood gene expression differentiates *Maf*- and *Mtb*-infected patients post-treatment.** Volcano plot illustrating significant differentially expressed genes (coloured red) between *Maf*- and *Mtb*-infected groups post-treatment. No fold change cutoff was set.

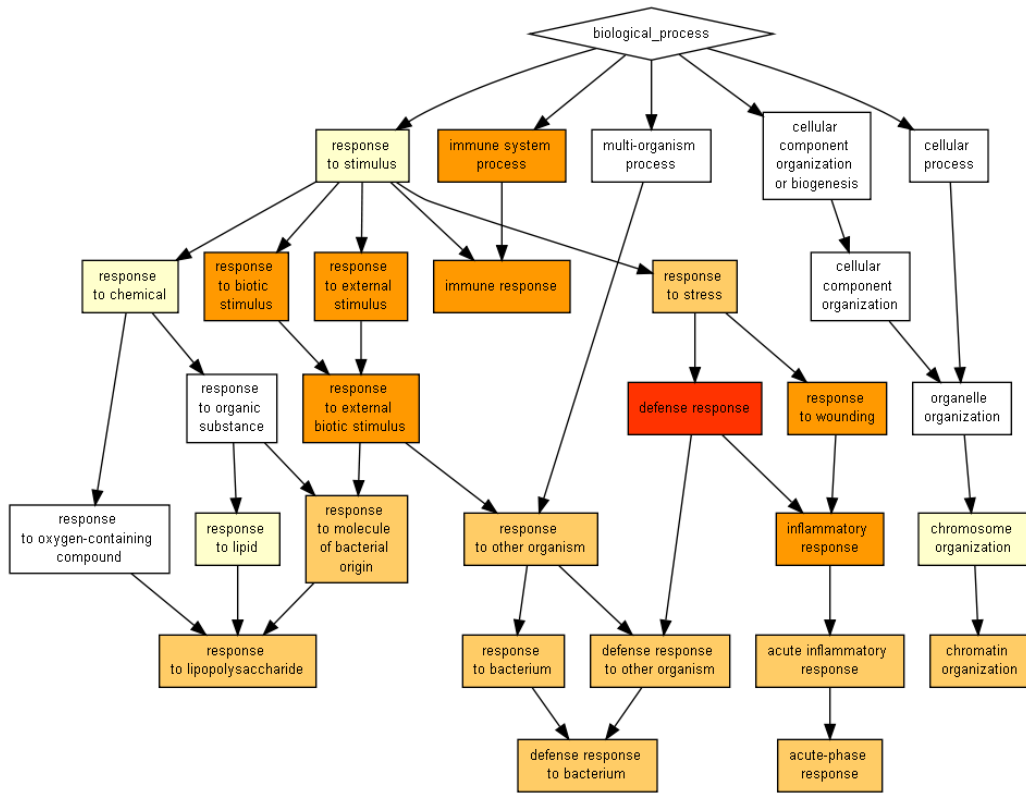

**Supplementary Figure 2: The GO enrichment of the genes correlated to serum arabinose concentration.**

The list of genes significantly correlated with serum arabinose concentration was analyzed using GOrilla for enrichment of biological processes. False detection rate (FDR) shows the significant enrichment of the processes: Red indicates  $q$ -value  $< 10^{-6}$ ; dark orange,  $q < 10^{-4}$ ; orange,  $q < 10^{-2}$ ; yellow and white,  $q$  not significant.
